# Supplementary material for: National Trends in the Use of Antidepressants Between 1997 and 2009 and the Role of Medicare Part D Implementation
Source: Atypon-hosted journal article supplement (doi:10.1176/appi.ps.201200438), 2013-10-01

**Appendix Table A1 Sample characteristics by insurance group**

| Variables                                 | Medicare<br>(N=2,252) |    | Medicaid<br>(N=4,728) |    | Dual<br>(N=1,587) |    | Private<br>(N=14,025) |    |
|-------------------------------------------|-----------------------|----|-----------------------|----|-------------------|----|-----------------------|----|
|                                           | N                     | %  | N                     | %  | N                 | %  | N                     | %  |
| Age (M±SD)                                | 66.7±13.5             |    | 35.0±15.3             |    | 57.8±16.1         |    | 46.0±16.9             |    |
| Gender                                    |                       |    |                       |    |                   |    |                       |    |
| Male                                      | 773                   | 34 | 1,265                 | 27 | 454               | 29 | 4,499                 | 32 |
| Female                                    | 1,479                 | 66 | 3,463                 | 73 | 1,123             | 71 | 9,526                 | 68 |
| Race <sup>a</sup>                         |                       |    |                       |    |                   |    |                       |    |
| White                                     | 1,715                 | 76 | 2,388                 | 51 | 907               | 57 | 11,449                | 82 |
| Black                                     | 256                   | 11 | 1,033                 | 22 | 278               | 18 | 962                   | 7  |
| Hispanic                                  | 281                   | 12 | 1,307                 | 28 | 402               | 25 | 1,668                 | 12 |
| Education                                 |                       |    |                       |    |                   |    |                       |    |
| 0 – 12 years                              | 1,550                 | 69 | 3,979                 | 85 | 1,247             | 79 | 6,740                 | 48 |
| 13 – 15 years                             | 383                   | 17 | 581                   | 12 | 221               | 14 | 3,580                 | 26 |
| 16 and more years                         | 298                   | 13 | 135                   | 3  | 95                | 6  | 3,661                 | 26 |
| Family Income                             |                       |    |                       |    |                   |    |                       |    |
| ≤124% FPL <sup>b</sup>                    | 727                   | 32 | 3,263                 | 69 | 1,000             | 63 | 1,285                 | 9  |
| 125%-199% FPL                             | 498                   | 22 | 883                   | 19 | 308               | 19 | 1,789                 | 13 |
| 200%-399% FPL                             | 661                   | 29 | 498                   | 11 | 224               | 14 | 4,995                 | 36 |
| 400% or more FPL                          | 366                   | 16 | 84                    | 2  | 55                | 3  | 5,956                 | 42 |
| Chronic Conditions                        |                       |    |                       |    |                   |    |                       |    |
| High Blood Pressure                       | 1,202                 | 53 | 1,161                 | 25 | 814               | 51 | 3,659                 | 26 |
| Heart Disease                             | 654                   | 29 | 526                   | 11 | 427               | 27 | 1,704                 | 12 |
| High Cholesterol                          | 655                   | 29 | 554                   | 12 | 423               | 27 | 2,217                 | 16 |
| Diabetes                                  | 511                   | 23 | 446                   | 9  | 380               | 24 | 1,216                 | 9  |
| Joint Pain                                | 1,366                 | 61 | 1,851                 | 39 | 1,003             | 63 | 5,870                 | 41 |
| Arthritis                                 | 1,134                 | 50 | 1,147                 | 24 | 816               | 51 | 3,400                 | 24 |
| Asthma                                    | 312                   | 14 | 997                   | 21 | 357               | 23 | 1,644                 | 12 |
| Number of prescription drugs taken (M±SD) | 5.8±3.2               |    | 3.8±3.2               |    | 6.5±3.6           |    | 3.9±3.0               |    |
| Antidepressant Use                        | 844                   | 37 | 1,205                 | 25 | 584               | 37 | 3,417                 | 24 |

<sup>a</sup> White and black categories contain non-Hispanic ethnicity<sup>b</sup> FPL: Federal Poverty Level

Appendix Figure A1 Trend of antidepressant use (Unadjusted rates)

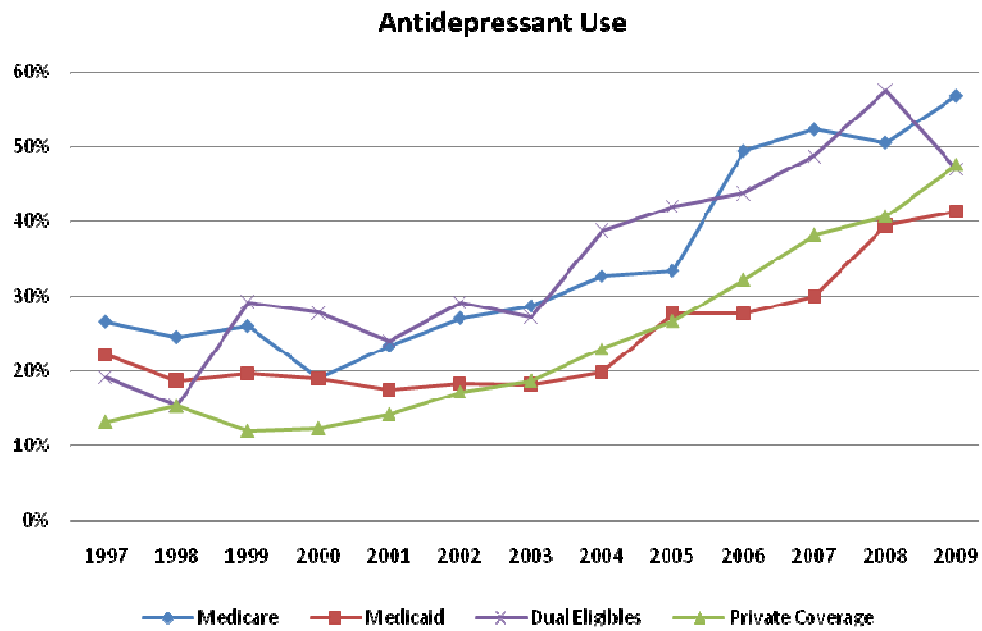

Supplement: 1038_ds001.pdf [file 1038_ds001.pdf]
